# Supplementary material for: Supramolecular polymer micelles prepared by steric effect tuned self-assembly: a new strategy for self-assembly
Source: Royal Society of Chemistry journal article supplement (doi:10.1039/c1sm05438d), 2011-01-01
Supplement: c1sm05438d.pdf [file c1sm05438d.pdf]

Electronic Supplementary Information

*of*

**Supramolecular Polymer Micelles Prepared by Steric Effect Tuned Self-assembly:**

**A New Strategy for Self-assembly**

5

Yong-Yong Li,<sup>a,b</sup> Hai-Qing Dong,<sup>a,b</sup> Yun Liu,<sup>a</sup> Han Cheng,<sup>a</sup> Cao Li,<sup>a</sup> Wang Xiao,<sup>a</sup> Cong Chang,<sup>a</sup>  
Shou-Hu Hua,<sup>a</sup> Xuan Zeng,<sup>a</sup> Si-Xue Cheng,<sup>a</sup> Xian-Zheng Zhang\*,<sup>a</sup> and Ren-Xi Zhuo<sup>a</sup>

<sup>a</sup> *Key Laboratory of Biomedical Polymers of Ministry of Education & Department of Chemistry,*

10

*Wuhan University, Wuhan 430072, P. R. China*

<sup>b</sup> *The Institute for Advanced Materials and Nano Biomedicine, Tongji University, Shanghai 200092, P.*

*R. China*



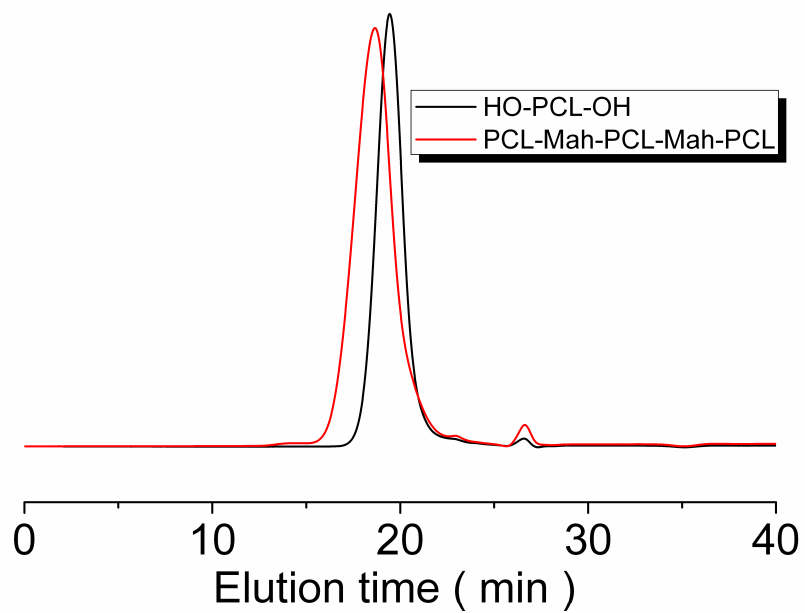

Figure S1: GPC traces of HO-PCL-OH and PCL-Mah-PCL-Mah-PCL.

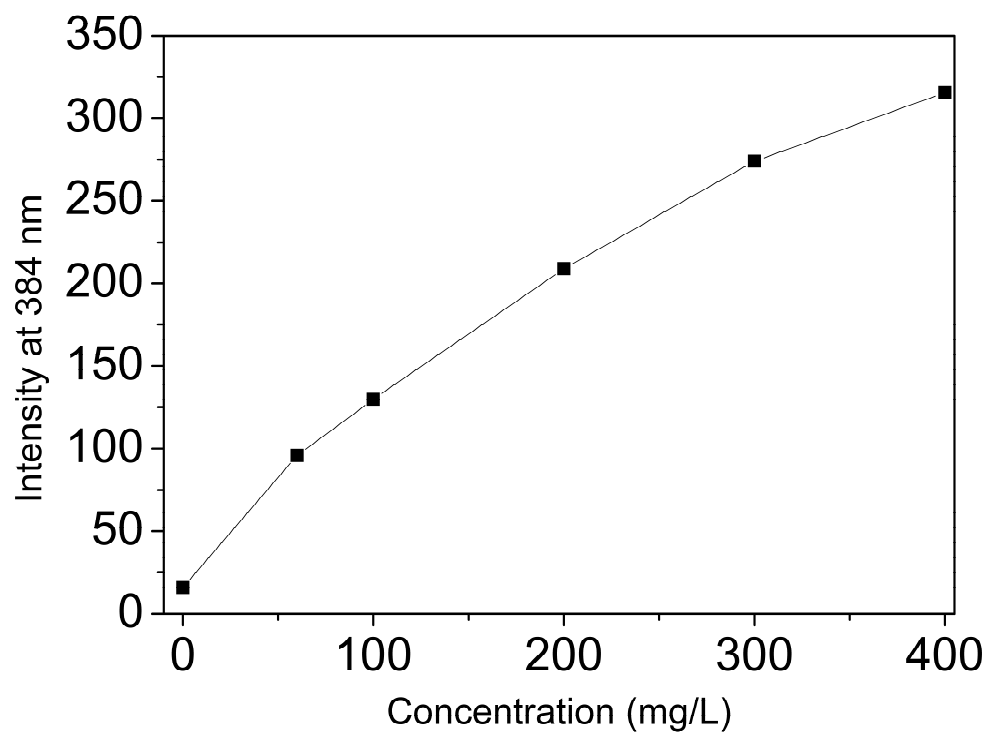

5 Figure S2: Emission intensity of pyrene at 384 nm with different concentrations of freeze-dried  $\alpha$ -CD/PCL-Dox-PCL-Dox-PCL SMPMs.

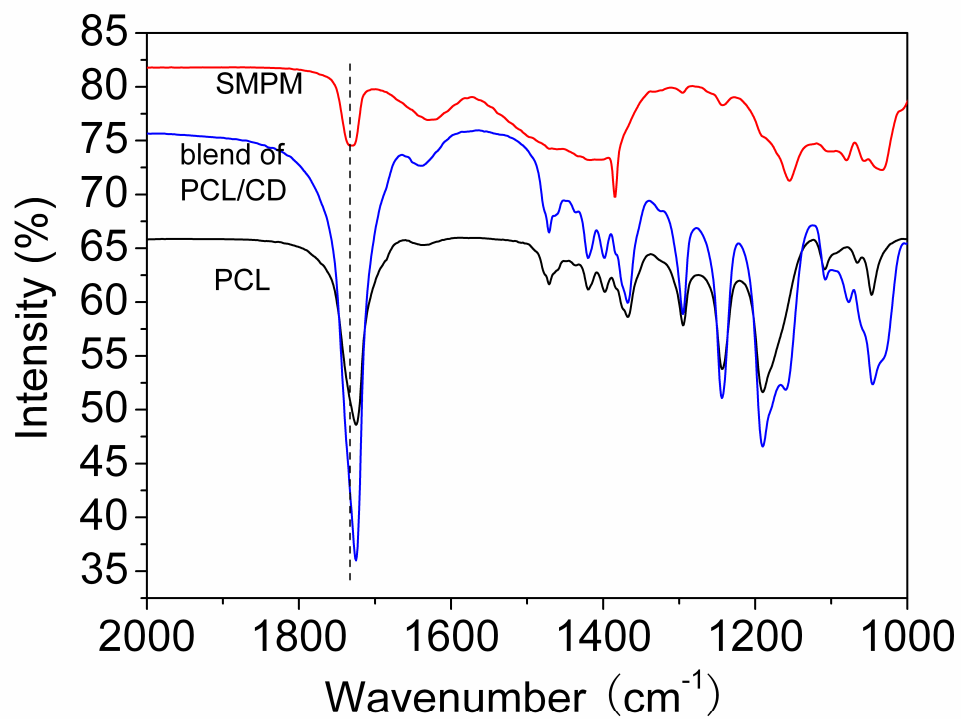

Figure S3: FT-IR spectra of SMPMs, PCL-Dox-PCL-Dox-PCL, and the blend of PCL-Dox-PCL-Dox-PCL and CD.

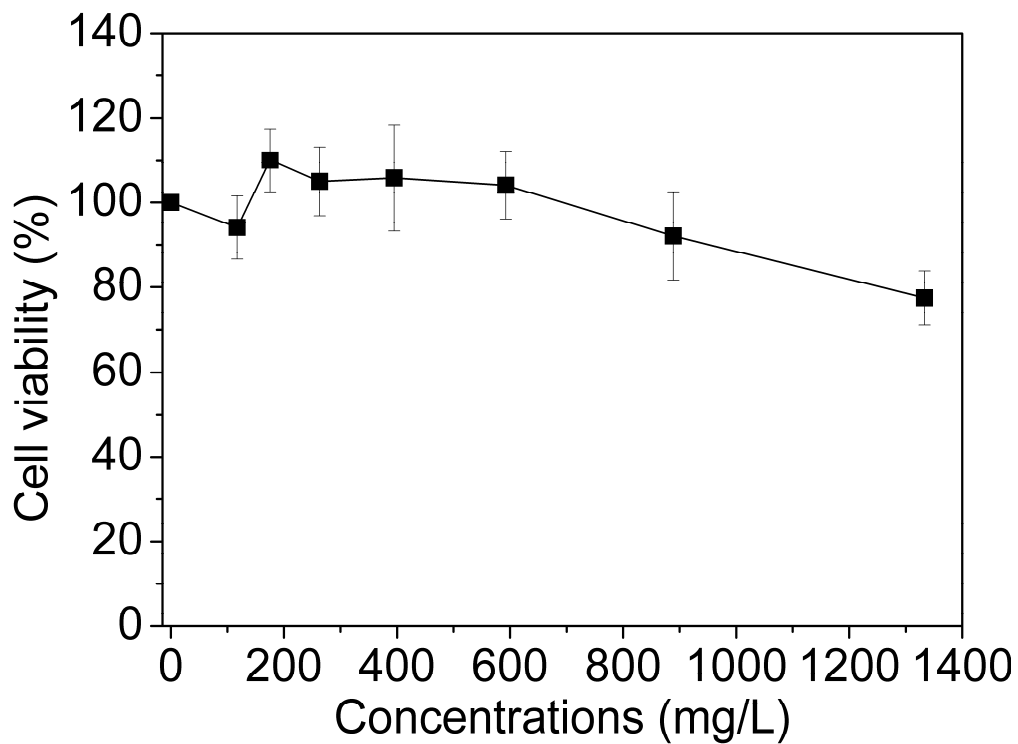

Figure S4: HepG2 cell viability as a function of the concentration of SMPMs.

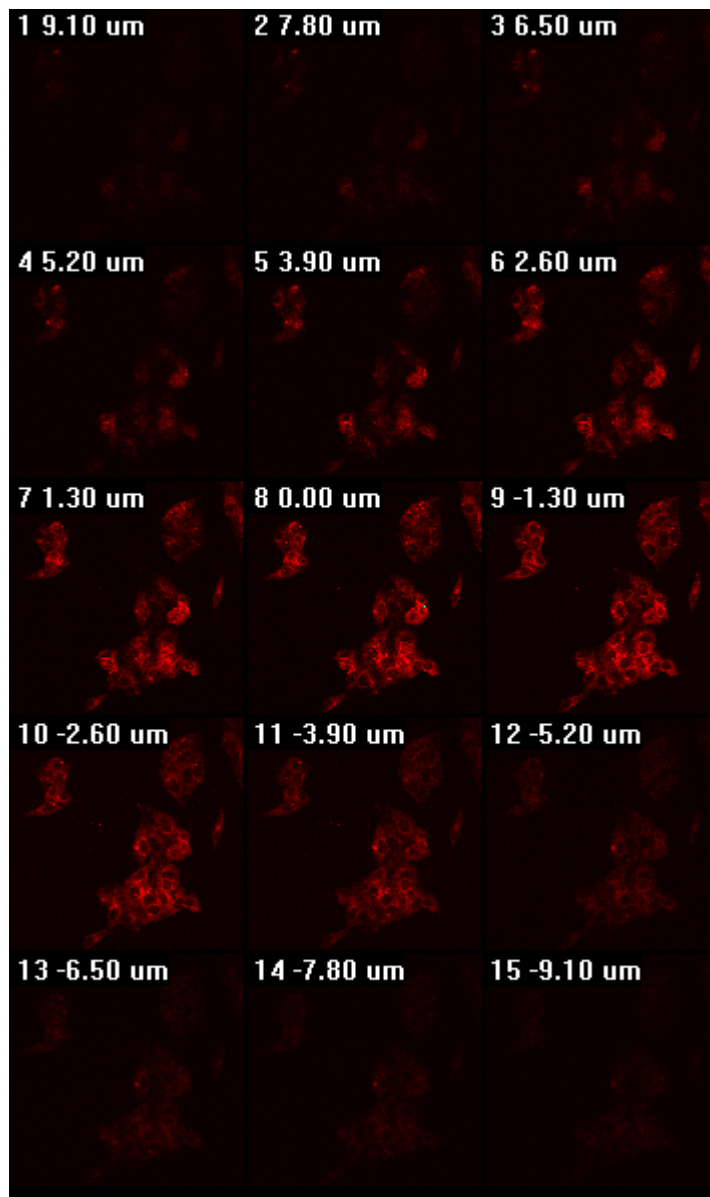

Figure S5. Typical Images of HepG2 cells cultured at 37 °C with SMPMs on  $z$  axis after excitation at 543 nm. (1-15: photos of cells obtained through laser line scanning)
